1 Influence of genetic polymorphism on transcriptional enhancer activity in the malaria vector  
2 *Anopheles coluzzii*

3

4

5 Luisa Nardini 1,2\*, Inge Holm 1,2\*, Adrien Pain 1,2,3, Emmanuel Bischoff 1,2, Daryl M Gohl  
6 4,5, Soumanaba Zongo 6, Wamdaogo M. Guelbeogo 6, N’Fale Sagnon 6, Kenneth D Vernick  
7 1,2\*\*, Michelle M Riehle 7\*\*

8

9 1 Unit of Insect Vector Genetics and Genomics, Department of Parasites and Insect Vectors,  
10 Institut Pasteur, Paris, France

11 2 CNRS Unit of Evolutionary Genomics, Modeling, and Health (UMR2000), Institut Pasteur,  
12 Paris, France

13 3 Institut Pasteur Bioinformatics and Biostatistics Hub (C3BI), CNRS USR 3756, Institut  
14 Pasteur, Paris, France

15 4 University of Minnesota Genomics Center, Minneapolis, MN, USA

16 5 Department of Genetics, Cell Biology, and Development, University of Minnesota,  
17 Minneapolis, MN, USA

18 6 Centre National de Recherche et de Formation sur le Paludisme (CNRFP), Ouagadougou,  
19 Burkina Faso

20 7 Department of Microbiology and Immunology, Medical College of Wisconsin, Milwaukee  
21 WI, USA

22

23 \* These authors contributed equally to this work

24

25 \*\* Equivalent corresponding authors

26 Email: MMR, [mriehle@mcw.edu](mailto:mriehle@mcw.edu); KDV, [kvernick@pasteur.fr](mailto:kvernick@pasteur.fr)

27

28 Author emails:

29 LN [nardiniluisa1@gmail.com](mailto:nardiniluisa1@gmail.com)

30 IH [inge.holm@pasteur.fr](mailto:inge.holm@pasteur.fr)

31 AP [adrien.pain@pasteur.fr](mailto:adrien.pain@pasteur.fr)

32 EB [bischoff@pasteur.fr](mailto:bischoff@pasteur.fr)

33 DMG [dmgohl@umn.edu](mailto:dmgohl@umn.edu)

34 SZ [zongosoumanaba@gmail.com](mailto:zongosoumanaba@gmail.com)

35 WMG [guelbeogo.cnrfp@fasonet.bf](mailto:guelbeogo.cnrfp@fasonet.bf)

36 NS [n.fale.cnlp@fasonet.bf](mailto:n.fale.cnlp@fasonet.bf)

37 KDV [kvernick@pasteur.fr](mailto:kvernick@pasteur.fr)

38 MMR [mriehle@mcw.edu](mailto:mriehle@mcw.edu)

39 **ABSTRACT**

40 Enhancers are cis-regulatory elements that control most of the developmental and spatial  
41 gene expression in eukaryotes. Genetic variation of enhancer sequences is known to  
42 influence phenotypes, but the effect of enhancer variation upon enhancer functional activity  
43 and downstream phenotypes has barely been examined in any species. In the African  
44 malaria vector, *Anopheles coluzzii*, we identified a pilot set of candidate enhancers in the  
45 proximity of genes relevant for immunity, insecticide resistance, and development. The  
46 candidate enhancers were functionally validated using luciferase reporter assays, and their  
47 activity was found to be essentially independent of their physical orientation, a typical  
48 property of enhancers. All of the enhancer intervals segregated genetically polymorphic  
49 alleles, which displayed significantly different levels of functional activity, and inactive null  
50 alleles were also observed. Deletion mutagenesis and functional testing revealed a modular  
51 structure of positive and negative regulatory elements within the tested enhancers. The  
52 enhancer alleles carry genetic polymorphisms that also segregate in wild *A. coluzzii*  
53 populations in West Africa, indicating that enhancer variants with likely phenotypic  
54 consequences are frequent in nature. These results demonstrate the feasibility of screening  
55 for naturally polymorphic *A. coluzzii* enhancers that underlie important aspects of malaria  
56 transmission and vector biology.

## 57 INTRODUCTION

58 Enhancers are short cis-acting regulatory elements in noncoding DNA that amplify  
59 transcriptional levels of target genes by tens to hundreds fold over the basal level of core  
60 promoter elements at the transcription start site. Enhancers control transcriptional activity  
61 of target genes and are responsible for most regulated gene expression in the  
62 transcriptome. The precise mechanisms of enhancer action is unknown and is an area of  
63 active study<sup>1-3</sup>. Enhancers can function at a distance from target genes and independent of  
64 their physical orientation in the chromosome<sup>4</sup>. The identities of enhancers and some of  
65 their interacting protein factors that lead to their regulatory function have been described in  
66 well-studied model organisms, but enhancers cannot be reliably predicted by sequence-  
67 based algorithms, and thus must be detected directly by functional activity using reporter  
68 assays, or indirectly inferred using methods to detect open or modified chromatin  
69 properties.

70

71 Sequence polymorphism within enhancers has been associated with phenotypic differences,  
72 including predisposition to disease, as observed in diverse organisms<sup>2,5-8</sup>. Most of the  
73 significant variants mapped in human genome-wide association studies (GWAS) are  
74 noncoding<sup>9</sup>, and at least 60-70% of significantly associated human GWAS single-nucleotide  
75 point mutations (SNPs) lie within functional enhancers<sup>5,10</sup>. In cancer studies, the majority of  
76 tumor-driving mutational changes are also thought to be in noncoding regulatory elements,  
77 especially enhancers<sup>11</sup>.

78

79 Genetic variation in enhancers can occur as SNPs, insertions and deletions (indels), and as  
80 copy number variants<sup>12-14</sup>. Enhancer variation among individuals can underlie both

81 Mendelian and complex traits<sup>4,15,16</sup>. At the population level, positively-selected variation in  
82 enhancers controlling key pathways likely plays an important role in differentiation and  
83 evolution<sup>17,18</sup>. Indeed, some of the fastest-evolving parts of the human genome as  
84 compared to other primates are functional embryonic enhancers related to central nervous  
85 system development<sup>19</sup>. In another example, the vertebrate ZRS enhancer influencing limb  
86 development displays strong conservation across a range of vertebrates, although in  
87 advanced snakes where skeletal limb structures are absent, mutations render the enhancer  
88 inactive<sup>20</sup>. Finally, stickleback fish display development of lateral pelvic spines in some  
89 populations, which may be protective under certain predation regimes but may be an  
90 adaptive liability in others, and spines have been independently lost in different populations.  
91 Sequence differences in the Pitx1 enhancer among spined and spineless populations  
92 correlate with the phenotype, and enhancer swaps restore or abolish spine development<sup>21</sup>.  
93 Thus, relatively simple evolved sequence variation in enhancers can produce large  
94 phenotypic shifts in the organism<sup>22,23</sup>. Despite these few examples, the effect of genetic  
95 variation on enhancers has barely been examined in any species, and to our knowledge, the  
96 functional effect of variation on enhancer activity has not been systematically surveyed in  
97 any organism.

98

99 Enhancer discovery in mosquitoes is limited to a few previous studies using indirect methods  
100 based on detection of chromatin properties to infer enhancer locations<sup>24-26</sup>. However,  
101 nothing is known about mosquito enhancer genetic variation and influence on vector  
102 phenotypes, and thus it is necessary to first develop the baseline criteria to distinguish and  
103 study enhancers in *A. coluzzii*. To this end, here we select a pilot set of candidate enhancers  
104 in order to benchmark the parameters needed for reliable enhancer discovery, validation,

105 and determination of polymorphism effects in *Anopheles*. We validate the pilot candidates  
106 as functional enhancers using luciferase reporter assays, and measure the effects of genetic  
107 polymorphism on enhancer activity. The results of the current report are a first step towards  
108 developing a comprehensive genome-wide catalog of *Anopheles* enhancers, and biological  
109 studies to characterize enhancer function in vector biology.

## 110 RESULTS

### 111 Candidate enhancer selection

112 The standard approach for enhancer detection is by functional testing using luciferase  
113 reporter assays that directly measure enhancer activity, or by indirect methods such as ChIP-  
114 seq, which can infer the presence of a subset of enhancers by correlation with chromatin  
115 features. Here, we implemented for the first time in *Anopheles* a screen (Self-Transcribing  
116 Active Regulatory Region sequencing, STARR-seq) that detects enhancers directly by a  
117 functional reporter assay analogous to the luciferase reporter assay, but with the readout of  
118 enhancer-dependent RNA transcript output measured as sequenced cDNA, rather than by  
119 luciferase light output <sup>27</sup>.

120

121 In order to identify candidate *A. coluzzii* enhancers, we examined our generated sequence  
122 data from the functional screen in the vicinity of six selected genes using the Integrative  
123 Genomics Viewer (IGV) <sup>28</sup>. Candidate enhancers were identified by using IGV to manually  
124 search near the selected genes to detect intervals where coverage of the cDNA sequence  
125 track, indicative of enhancer activity in *A. coluzzii* 4a3A cells (Figure 1, solid lines) was visibly  
126 greater than the coverage of the plasmid sequence track, which is the internal baseline  
127 control indicating background levels of the plasmid in 4a3A cells (Figure 1, dotted lines). The  
128 target genes selected are involved in vector immunity: Krueppel-Like Factor 6/7 (KLF,  
129 AGAP007038), Leucine-Rich Immune protein (LRIM1, AGAP006348); insecticide resistance:  
130 Acetylcholinesterase (ACE1, AGAP001356), GABA-gated chloride channel subunit (Rdl,  
131 AGAP006028); and developmental biology: LIM homeobox protein 2/9, ortholog of  
132 *Drosophila* apterous FBgn0267978 (AP, AGAP008980), and Ovo, AGAP000114 (Table1). The  
133 regulatory regions and enhancers of the latter two genes, apterous and Ovo, have been well

134 characterized for the *Drosophila* orthologs<sup>29-31</sup>. In addition, a negative control interval was  
135 chosen as a size-matched interval located within intron 1-2 of the gene, homeobox protein  
136 distal-less (DLX, AGAP007058) that has no visible divergence of cDNA and plasmid sequence  
137 tracks by IGV examination, and thus no predicted enhancer function. The candidate  
138 enhancer intervals are named according to the most proximal coding sequence.

139

#### 140 **Functional validation of enhancer activity**

141 The predicted candidate enhancers predicted in Figure 1 were functionally tested to validate  
142 the IGV-based predictions. The standard test for enhancer activity is by cloning the  
143 candidate in a plasmid carrying a basal promoter and a luciferase reporter gene in an  
144 episomal assay. An active enhancer will augment the rate of transcription from the basal  
145 promoter, thus elevating the expression level of the luciferase gene. Luciferase expression is  
146 measured by adding luciferase substrate to cell extract and detecting light output as relative  
147 light units (RLU). Enhancer activity, if any, is measured as increased luciferase activation  
148 above background.

149

150 Candidate amplicons from *A. coluzzii* (Table 1) were cloned into the firefly luciferase reporter  
151 vector pGL-Gateway-DSCP, and co-transfected into 4a3A cells with the renilla luciferase  
152 control vector pRL-ubi-63E. Firefly luciferase RLU measurements were corrected using the  
153 renilla luciferase internal control values in the same well, and firefly/renilla RLU for the  
154 experimental insert were statistically compared to the firefly/renilla mean value for the DLX  
155 negative control, defined as the background level. At least one clone of each candidate  
156 enhancer displayed luciferase activity levels above background ( $p < 0.005$ ), with activity  
157 across candidates that varied from 2-fold to more than 20-fold over background (Figure 2).

158 These results indicate that the IGV-based predictions were accurate for all six predicted  
159 candidates, and thus validate these genomic intervals as functional *A. coluzzii* enhancers.  
160 This information provides the first benchmark criteria that can be used to develop the  
161 definitions and methods for subsequent algorithmic genome-wide detection of *A. coluzzii*  
162 enhancers.

163

#### 164 **Screening for polymorphic alleles of validated enhancer intervals**

165 Having confirmed that all six predicted candidates are functional enhancers, we next wished  
166 to identify genetically variable alleles for each enhancer interval and measure their  
167 luciferase activity. For this, alleles of the enhancer intervals were amplified and sequenced  
168 from *A. coluzzii* colonies initiated from the populations in Cameroon, Mali or Burkina Faso.  
169 For each of the six enhancer intervals, at least two distinct genetic variants were chosen for  
170 tests of enhancer activity. The enhancer interval alleles were cloned and sequenced, and  
171 neighbor joining (N-J) trees depict the evolutionary relatedness and degree of sequence  
172 difference of the alleles (Figure 3). Complete sequences for all tested enhancer interval  
173 alleles are presented in Supplementary File S1.

174

#### 175 **Genetic alleles of validated enhancer intervals display distinct enhancer activity**

176 Luciferase activity was measured for all alleles to determine the effect of genetic variation  
177 on differences in functional enhancer activity. For five of the six enhancers, alleles displayed  
178 significantly different levels of enhancer activity (Figure 4). For a given enhancer, alleles with  
179 the greatest difference in activity tended to be the most genetically different from each  
180 other (see also Figure 3). For example, the alleles of the KLF interval cloned from colonies  
181 Fd05 and Fd03 are the most closely related genetically, and these also do not display a



182 difference in luciferase activity as compared to the allele from colony Fd09. For two  
183 enhancer intervals (LRIM1 and ACE1), at least one genetic variant displayed activity levels  
184 that were not significantly different from background, which effectively represents a  
185 naturally occurring functionally inactive null enhancer allele. Genetic variation segregating at  
186 the enhancer of Ovo did not display a significant influence on luciferase activity, and the Ovo  
187 enhancer appears to display the consistently highest luciferase activity over all alleles tested  
188 for any of the six enhancer intervals. These results indicate that genetic alleles of validated  
189 enhancer intervals can display significantly different levels of functional activity. It is  
190 reasonable to expect that large observed differences in enhancer activity will be translated  
191 into phenotypic differences in the organism, related to the functions of the target genes that  
192 are regulated by the polymorphic enhancer alleles. This prediction will need to be tested in  
193 manipulative experiments.

194

#### 195 **Enhancer activity is essentially independent of physical orientation**

196 Enhancers tend to function independently of their physical orientation in the genome, which  
197 is testable when the candidate is cloned in a luciferase reporter plasmid. For three of the  
198 above validated enhancers, we recloned two alleles in both orientations in the reporter and  
199 measured luciferase activity. For the KLF and AP enhancers, there was no detectable effect  
200 of orientation (Figure 5). The LRIM1 enhancer displayed a weakly significant effect of  
201 orientation for allele Fd05\_#1 ( $p=0.042$ ), although for both orientations of the LRIM1  
202 enhancer the absolute activity values were lower than the other enhancers tested (indicated  
203 by y-axis values in Figure 5), and thus the weak orientation difference for this one weak  
204 allele is not robustly supported. Thus, most of the enhancer alleles tested displayed function  
205 independent of their physical orientation with respect to the basal promoter.

206

207 **Enhancer dissection reveals a modular structure of positive and negative regulatory**  
208 **elements**

209 To resolve the minimal portion of the enhancer interval that carries the enhancer function,  
210 we carried out deletion mutagenesis for two different genetic alleles of the LRIM1 enhancer  
211 interval, one allele with high enhancer activity and the other low. The deletion derivatives  
212 carried 50% or 25% of the length of the initial enhancer interval, reduced equally from both  
213 ends. We tested the deletion clones for luciferase activity, along with the original undeleted  
214 enhancer (Figure 6A). Surprisingly, for LRIM1 allele Fd03\_#3, the 50% construct displayed  
215 the highest luciferase activity, greater than either 100% or 25% constructs. This indicates  
216 that the integral 100% Fd03\_#3 allele carries negative regulators of enhancer function,  
217 which were deleted in the 50% derivative to yield a derivative with elevated enhancer  
218 activity. The 25% derivative of allele Fd03\_#3 displays significantly lower activity than the  
219 50% derivative, suggesting that positive regulators of enhancer function are located outside  
220 the 25% derivative, but within the 50% derivative.

221

222 Deletion derivatives of LRIM1 allele Fd05\_#1 display a pattern distinct from the Fd03\_#3  
223 allele. For Fd05\_#1, each incrementally smaller derivative was more active. This result was  
224 also surprising, because it indicates that a highly active core enhancer element within the  
225 smallest 25% derivative is attenuated by negative regulators that are progressively removed  
226 from 100% to 50% in length, and again from a 50% to 25% length interval. The deletion  
227 results indicate that enhancer activity is not directly correlated with sequence length, that  
228 there is a complex structure of functional elements and modifiers within the enhancer

229 interval, and that different alleles of the same enhancer are comprised of distinct  
230 combinations of modular regulators that differentially influence transcription.

231

232 The density of variable sites between Fd03\_#3 and Fd05\_#1 varies across the interval, such  
233 that there were 60 variable nucleotide sites in the integral 100% length alleles, 37 variable  
234 sites in the 50% derivatives and 22 sites in the 25% derivatives (Figure 6B). Finally, it is  
235 notable that the 25% derivative for allele Fd05\_#1 displays activity levels indistinguishable  
236 from the Fd03\_#3 50% derivative ( $p=0.99$ ), even though they are no more genetically similar  
237 than the integral 100% enhancer sequences for both alleles (Figure 6C). This result highlights  
238 the relative independence of enhancer functional level from primary sequence patterns,  
239 unlike the fundamental dependence of protein coding gene function on the amino acid  
240 primary sequence code, and the consequent requirement for identification of enhancers by  
241 detecting functional activity.

242

### 243 **Enhancer alleles segregate in the natural *Anopheles coluzzii* population**

244 To confirm that the genetic variation observed in the enhancer alleles was natural and not  
245 an artifact of laboratory colonies, we compared sequence data for the six enhancer intervals  
246 to genetic variation observed in wild *A. coluzzii* from whole genome sequence of the  
247 *Anopheles gambiae* 1000 (Ag1000) Genomes Consortium<sup>32</sup>. The comparison indicates that  
248 genetic variation is shared between the cloned *A. coluzzii* colony haplotypes used in  
249 luciferase assays and the natural population (Figure 7). Representative short sequence  
250 alignments are shown, and full-length alignments with larger numbers of wild mosquitoes  
251 are presented in Supplementary File S2. This analysis demonstrates that genetic variants  
252 within confirmed functional enhancer intervals, associated with differential enhancer

253 activity, segregate in nature and do not represent variants unique to lab colonies. Natural  
254 segregation of variants associated with differential enhancer function supports the  
255 interpretation that the differential function of enhancer alleles (Figure 4) based on a  
256 modular structure of regulatory elements (Figure 6) likely result from natural selection for  
257 distinct phenotypic outcomes of allelic enhancer function.

258 **DISCUSSION**

259 Here we identify and validate candidate enhancer noncoding regulatory elements in the  
260 malaria vector, *A. coluzzii*. We show that naturally segregating genetic variation significantly  
261 influences enhancer activity levels, which likely leads to differences in biological function and  
262 ultimately mosquito phenotype. Some enhancer alleles display high activity while others  
263 display little or no activity above background and are thus naturally occurring enhancer null  
264 alleles. The enhancers also tend to display activity that is independent of their physical  
265 orientation, a common property of enhancers<sup>4</sup>. A structure-function dissection study of two  
266 enhancer alleles by deletion mutagenesis revealed a complex modular organization of  
267 positive and negative modifiers that modulate enhancer activity. The current study provides  
268 proof of principle for the influence of enhancer genetic polymorphism for enhancer  
269 functional activity levels. These results provide benchmark parameters that can now be  
270 implemented to develop a comprehensive genome-wide *Anopheles* enhancer catalog. The  
271 current work is thus a step toward the long-term goal to identify functionally important  
272 transcription factor binding motifs and correlate enhancer output with phenotypes related  
273 to *Anopheles* biology, immunity and pathogen transmission.

274

275 By modifying the level of enhancer activity, genetic variation in enhancers can cause  
276 quantitative changes in expression of the target genes regulated by the enhancers. Altered  
277 expression profiles of enhancer target genes probably in turn trigger distinct phenotypic  
278 outcomes. Different from mutations in protein coding genes, enhancers are typically located  
279 in noncoding DNA, and there is no sequence pattern to aid interpretation of noncoding  
280 variants. Here, we identified enhancer intervals proximal to genes underlying the important  
281 vector phenotypes of insecticide resistance, immunity, and development. Most mosquito

282 studies to date have focused solely on genes and proteins associated with these traits,  
283 rather than regulatory elements controlling the genes, in part due to the limited information  
284 available for the noncoding mosquito genome. The development of a methodology for  
285 screening and evaluation of *Anopheles* enhancers is an initial step towards a more  
286 comprehensive study of enhancers and their polymorphism effects. The current enhancers  
287 were located near known functional genes, but further work will be required to determine  
288 the actual influence, if any, of these enhancers upon the nearby genes, which is not known.  
289 Moreover, enhancer function is also controlled on spatial and temporal scales, and  
290 understanding *Anopheles* enhancers and their effects on phenotypes in detail will ultimately  
291 require incorporating this information.

292

293 Enhancers were identified and individual genetic variants were tested for their activity by  
294 means of standard luciferase reporter assays. Interestingly, we detected variant alleles with  
295 significant difference in their functional enhancer activity, including functional null alleles  
296 that lack enhancer activity above background. For example, the LRIM1 enhancer Fd05\_#1  
297 allele or the ACE1 Fd03\_#1 allele likely represent the ablation of an important transcription  
298 factor binding site, resulting in the absence of enhancer activity above background with  
299 likely downstream functional consequences. The range in functional enhancer activity that  
300 we observed is likely to affect phenotypes produced by the genes they transcriptionally  
301 regulate. Moreover, we demonstrate that variant alleles tested by luciferase activity in  
302 laboratory colonies also segregate in the wild population, and are therefore subject to  
303 natural selection. Thus, it is intriguing that selection has apparently generated a wide range  
304 of natural allelic forms of enhancers, including alleles that lack functional activity. This is  
305 consistent with the observation that genetic variation for enhancer function offers powerful

306 raw material for adaptation and evolutionary change<sup>8,17,20,21</sup>. The members of the Gambiae  
307 species complex, including *A. coluzzii*, are highly adaptable to a range of ecological  
308 conditions, and durable to vector control measures. This is thought to be associated with  
309 their high genetic diversity<sup>32</sup>. The current study now reveals standing genetic variation for  
310 enhancer function as a likely new contributing factor for the success of this mosquito and its  
311 relatives.

312

313 We functionally dissected two alleles of the LRIM1 enhancer, high and low activity variants,  
314 respectively, by deletion mutagenesis (Figure 6). By measuring functional activity of integral,  
315 50% and 25% length derivatives of the intervals, we detected a modular structure of positive  
316 and negative regulators comprising the enhancer. Interestingly, deletion derivatives of the  
317 two alleles behaved differently, indicating that the deletions was not a simple consequence  
318 of sequence length. The high-activity allele Fd03\_#3 appears to carries a negative regulator  
319 in the terminal one-quarter of its length on one or both ends, because removal of these  
320 sequences led to significantly elevated activity in the remaining 50% derivative as compared  
321 to the integral enhancer. However, removal of an additional one-quarter again of the  
322 sequence from both ends of the 50% derivative then diminished activity to a level below  
323 that of the integral enhancer, suggesting that the positive regulator(s) revealed in the 50%  
324 length derivative was no longer present in the 25% length derivative.

325

326 That the low activity of the smallest derivative of Fd05\_#1 was not a simple consequence of  
327 sequence length is made clear by a similar examination of the low-activity allele Fd05\_#1. In  
328 this case, each incremental length decrease of the tested sequence led to increased  
329 enhancer activity. The Fd05\_#1 allele result suggests that the integral enhancer displayed

330 low activity because it carried multiple negative regulators, which were resected by each  
331 successive deletion, revealing a highly active core enhancer element within the smallest  
332 interval tested. This latter minimal derivative of the low-activity Fd05\_#1 allele carries an  
333 enhancer with, in fact, higher enhancer activity than the integral 100% sequence of the high-  
334 activity Fd03\_#3 allele.

335

336 The LRIM1 deletion dissection results suggest that that large functional allelic diversity can  
337 be generated for a given enhancer interval by the combinatorial effect of positive and  
338 negative modifiers. Sequence changes in enhancers can generate or remove binding motifs  
339 for transcription factors and other regulatory proteins, which can modify transcription levels  
340 directly<sup>33,34</sup>, or indirectly through loss of chromatin accessibility<sup>14</sup>. From the current results,  
341 we do not know whether the positive and negative modifiers within the LRIM1 alleles are  
342 comprised of reusable modular cassettes that are combined to fine-tune the activity of  
343 different enhancer intervals, or whether segregating SNPs in an enhancer can explain  
344 significant difference in functional activity. In the first model, such modifier modules should  
345 be recognizable with enough data, while under the second model, different modifiers, for  
346 example positive modifiers in different enhancers, may have little or no recognizable  
347 common pattern. Fine resolution nucleotide-level deletion series of a number of alleles  
348 would be required to determine the kind and extent of sequence difference necessary to  
349 alter enhancer functional levels in order to distinguish between the above models. Finally,  
350 the phenotypic implications of differentially active enhancer alleles will require  
351 determination of target gene networks regulated by an enhancer, as well as the protein-DNA  
352 interactions underlying differential enhancer allele activity.

353



354 Vector control has been central to the malaria control effort by use of indoor residual  
355 spraying and long-lasting insecticide impregnated bednets. However, over-reliance on these  
356 methods has led to widespread insecticide resistance in wild populations, and novel  
357 methods of control are now required. The noncoding regulatory genome in *Anopheles* has  
358 the potential to provide novel new targets for vector control, but until now has not been  
359 interpretable or exploitable. The current work presents a necessary first step towards  
360 establishing an efficient, effective method for associating noncoding variation with  
361 important mosquito phenotypes.

## 362 **METHODS**

### 363 **Wild mosquito samples and DNA library**

364 Mosquito larvae were collected in Goundry village, Burkina Faso (latitude 12.5166876,  
365 longitude -1.3921092) using described methods<sup>35</sup>, reared to adults, and were typed for  
366 species by the SINE200 X6.1 assay<sup>36</sup>. DNA from 60 *A. coluzzii* were pooled at equal volume  
367 and sheared using an S220 ultrasonicator (Covaris) to produce DNA fragments 800-1000 bp  
368 in length. Subsequently, DNA was processed as described for the STARR-seq assay<sup>27</sup>, cloned  
369 into the plasmid pSTARR-seq\_fly (AddGene 71499), transformed into MegaX DH10B T1R  
370 Electrocomp Cells (Invitrogen), cultured in LB + ampicillin (1ug/ml), and plasmid DNA was  
371 purified using the Plasmid Plus Mega Kit (Qiagen). The *Anopheles gambiae* PEST AgamP4  
372 genome assembly available at Vectorbase was used as the reference genome  
373 (<https://www.vectorbase.org/organisms/anopheles-gambiae/pest/agamp4>).

374

### 375 **Culture of plasmid library in *Anopheles* 4a3A cells**

376 Hemocyte-like 4a3A cells<sup>37</sup> were maintained on Insect X-Press media (Lonza) supplemented  
377 with 10% Fetal Calf Serum, at 27°C. We confirmed that cells were derived from *A. coluzzii* by  
378 species typing using the Fanello assay<sup>38</sup>. The plasmid DNA library was transfected and  
379 cultured in 4a3A cells as described<sup>27</sup> using Lipofectamine 3000 Reagent (Invitrogen) and  
380 cultured for 24 h, in three biological replicates. RNA was extracted from cells using the  
381 RNeasy Midi Kit (Qiagen) followed by mRNA purification using Dynabeads mRNA Purification  
382 Kit (ThermoFisher). Plasmid DNA was isolated using the Plasmid Plus Midi or Mini Kit  
383 (Qiagen).

384

### 385 **Analysis of 4a3A library culture results**

386 The mRNA purified from cells was reverse transcribed using SuperScript IV First-Strand cDNA  
387 Synthesis System (Invitrogen) as described for the STARR-seq assay <sup>27</sup> using a plasmid-  
388 specific primer (RT\_Rev, Supplementary Table S1), the cDNA was then amplified using  
389 primers Report\_Fwd and Report\_Rev (Supplementary Table S1), and the products were  
390 sequenced on an Illumina HiSeq 2500 in 2x125 bp high output mode. Cell plasmid DNA was  
391 amplified and sequenced in the same manner as the cDNA samples but using primers  
392 Plasmid\_Fwd and Plasmid\_Rev (Supplementary Table S1).

393

#### 394 **Selection of enhancer candidates**

395 The Integrative Genomics Viewer (IGV) <sup>28</sup> was used to select candidate enhancer intervals by  
396 visual examination in the proximity of six annotated genes of interest. For determination of  
397 enhancer activity, the RNA output transcribed from the STARR-seq reporter plasmid,  
398 converted to cDNA and sequenced as described above, is compared to the levels of the  
399 plasmid DNA, to control for differential plasmid replication. Thus, candidate enhancers were  
400 predicted in intervals where coverage of the cDNA sequence track was visibly greater than  
401 the baseline coverage of the plasmid sequence track. The target genes examined were  
402 Krueppel-Like Factor 6/7 (KLF, AGAP007038), Leucine-Rich Immune protein (LRIM1,  
403 AGAP006348), Acetylcholinesterase (ACE1, AGAP001356), GABA-gated chloride channel  
404 subunit (Rdl, AGAP006028), LIM homeobox protein 2/9, ortholog of *Drosophila* apterous  
405 FBgn0267978 (AP, AGAP008980), and Ovo, AGAP000114. In addition, a negative control  
406 interval was cloned, which was a size-matched interval located within intron 1 of the gene,  
407 homeobox protein distal-less (DLX, AGAP007058) that displayed no visible divergence of  
408 cDNA and plasmid sequence tracks by IGV examination, and thus no predicted enhancer

409 function. The candidate enhancer intervals are named according to the most proximal  
410 coding sequence (above and Table 1).

411

412 Candidate enhancers were amplified from DNA of mosquitoes from the following *A. coluzzii*  
413 colonies: Ngousso, initiated in Cameroon in 2006<sup>39</sup>, Fd03, Mali, 2008, Fd05, Mali 2008, Fd09,  
414 Burkina Faso, 2008, and Fd33, Burkina Faso, 2014. Fd colonies were previously described<sup>40</sup>.  
415 Primers are listed in Supplementary Table S2. Amplicons were cloned into the  
416 pCR8/GW/TOPO vector (Invitrogen) and sequenced with GW1 and GW2 primers. At least  
417 two genetically distinct sequences per candidate were then cloned into the firefly luciferase  
418 reporter plasmid pGL-Gateway-DSCP (AddGene 71506) using Gateway LR Clonase II  
419 (Invitrogen), transformed into OneShot OmniMax 2T1 Phage-Resistant Cells (Invitrogen), and  
420 plasmid was purified from overnight culture.

421

422 To test the effect of enhancer orientation, the enhancer was cloned in the opposite  
423 orientation in pGL-Gateway-DSCP. To test resolved enhancer intervals, the relevant  
424 enhancer insert was amplified with primers that generated either 50% or 25% of the initial  
425 insert size, equally reduced on both ends, and products were cloned in pGL-Gateway-DSCP.  
426 In all cases, plasmids were resequenced to confirm insert identity using the primers LucNrev  
427 and RVprimer3 (Supplementary Table S1).

428

#### 429 **Quantitation and statistical analysis of enhancer activity by luciferase assay**

430 The Dual-Glo Luciferase Assay System (Promega) was used for luciferase assays. *A. coluzzii*  
431 4a3A cells were seeded in 96 well plates at  $1 \times 10^5$  cells/well, the difference in volume if any  
432 was made up to 65  $\mu$ l with medium, and cells were incubated for 24 h at 27°C. Two plasmids

433 were transfected into the 4a3A cells, the enhancer candidate in firefly luciferase vector pGL-  
434 Gateway-DSCP, and the renilla luciferase control vector pRL-ubi-63E (AddGene 74280), at a  
435 ratio of 1:5 (renilla:firefly), using transfection reagent Lipofectamine 3000 (Invitrogen), and  
436 were then incubated for 24 h at 27°C.

437

438 Luciferase activity was detected on a GloMax Discover instrument (Promega) at 25°C, with  
439 two 20 min incubations, one after the addition of Dual-Glo Luciferase reagent (Promega) and  
440 another after the addition of Stop & Glo reagent (Promega). All samples were run in 6-fold  
441 replication within a single plate and across at least two independent plates, for at least two  
442 biological replicates of each candidate, yielding at least 12 measurements. Firefly luciferase  
443 measurements expressed in relative light units (RLU) were corrected using the  
444 measurements of RLU for the renilla luciferase internal control in the same well. Values for  
445 the DLX negative control on the same plate were defined as the background level. Values of  
446 firefly/renilla RLU for the experimental insert were normalized to the firefly/renilla mean  
447 value for DLX in order to combine results across replicates. Luciferase activity was declared  
448 above background if the firefly/renilla RLU ratio for the experimental insert was significantly  
449 higher than the firefly/renilla value for the DLX negative control. Luciferase activity was  
450 statistically compared using a non-parametric ANOVA (Kruskal-Wallis) with post hoc pairwise  
451 comparisons.

452

### 453 **Analysis of enhancer allelic variants**

454 The sequences of genetically polymorphic variants of a given enhancer interval, cloned from  
455 *A. coluzzii* colonies as described above, were analyzed for genetic relatedness. To generate  
456 neighbor joining (N-J) trees to depict the relationships between genetic variants for the

457 same enhancer, complete sequences were aligned using MUSCLE within the package  
458 Molecular Evolutionary Genetics Analysis Mega version X<sup>41</sup>, and N-J trees constructed using  
459 Mega. When at least four variants were tested, bootstrapping was performed and bootstrap  
460 values are included on N-J trees. Scale bars of trees represent 0.5, but each bar is a different  
461 length. The longer the 0.5 scale bar, the more genetically similar the sequences.

462

#### 463 **Analysis of wild *Anopheles* variation data**

464 Sequence information for 309 wild *A. coluzzii* from 6 West African countries; Angola (AR),  
465 Burkina Faso (AB), Cote d'Ivoire (AY), Ghana (AA), Guinea (AV) and Guinea-Bissau (AJ),  
466 generated as reported<sup>32</sup> were downloaded from MalariaGen  
467 (<https://www.malariagen.net/projects/ag1000g>) as VCF files from the Ag1000G phase 2 AR1  
468 data release and sequences of the six validated enhancer intervals were extracted. Next, we  
469 aligned the diploid sequences from the wild sequences, corresponding to the cloned  
470 sequences generated from the six tested enhancer intervals, which were validated for  
471 enhancer function by luciferase activity. Sequence alignments were visually examined for  
472 shared variation. Short representative sequence alignments are presented in Figure 7 (not  
473 including indels), and complete alignments relative to the PEST AgamP4 genome assembly,  
474 including indels, are presented in Supplementary File S2. Indel genotypes of the wild  
475 sequences shown in Supplementary File S2 are relative to the PEST reference haplotype,  
476 because the wild sequences were called for SNPs but not indels<sup>32</sup>.

477 **REFERENCES**

- 478 1 Hnisz, D., Shrinivas, K., Young, R. A., Chakraborty, A. K. & Sharp, P. A. A Phase  
479 Separation Model for Transcriptional Control. *Cell* **169**, 13-23,  
480 doi:10.1016/j.cell.2017.02.007 (2017).
- 481 2 Schaub, M. A., Boyle, A. P., Kundaje, A., Batzoglou, S. & Snyder, M. Linking disease  
482 associations with regulatory information in the human genome. *Genome research* **22**,  
483 1748-1759, doi:10.1101/gr.136127.111 (2012).
- 484 3 Chen, H. *et al.* Dynamic interplay between enhancer-promoter topology and gene  
485 activity. *Nat Genet* **50**, 1296-1303, doi:10.1038/s41588-018-0175-z (2018).
- 486 4 Pennacchio, L. A., Bickmore, W., Dean, A., Nobrega, M. A. & Bejerano, G. Enhancers:  
487 five essential questions. *Nat Rev Genet* **14**, 288-295, doi:10.1038/nrg3458 (2013).
- 488 5 Farh, K. K. *et al.* Genetic and epigenetic fine mapping of causal autoimmune disease  
489 variants. *Nature*, doi:10.1038/nature13835 (2014).
- 490 6 Kharchenko, P. V. *et al.* Comprehensive analysis of the chromatin landscape in  
491 *Drosophila melanogaster*. *Nature* **471**, 480-485 (2011).
- 492 7 Romanoski, C. E., Link, V. M., Heinz, S. & Glass, C. K. Exploiting genomics and natural  
493 genetic variation to decode macrophage enhancers. *Trends Immunol* **36**, 507-518  
494 (2015).
- 495 8 Sicard, A. *et al.* Standing genetic variation in a tissue-specific enhancer underlies  
496 selfing-syndrome evolution in *Capsella*. *Proceedings of the National Academy of  
497 Sciences of the United States of America* **113**, 13911-13916 (2016).
- 498 9 MacArthur, J. *et al.* The new NHGRI-EBI Catalog of published genome-wide  
499 association studies (GWAS Catalog). *Nucleic acids research* **45**, D896-D901,  
500 doi:10.1093/nar/gkw1133 (2017).
- 501 10 Neph, S. *et al.* An expansive human regulatory lexicon encoded in transcription factor  
502 footprints. *Nature* **489**, 83-90, doi:10.1038/nature11212 (2012).
- 503 11 Weinhold, N., Jacobsen, A., Schultz, N., Sander, C. & Lee, W. Genome-wide analysis of  
504 noncoding regulatory mutations in cancer. *Nat Genet* **46**, 1160-1165,  
505 doi:10.1038/ng.3101 (2014).
- 506 12 Heinz, S. *et al.* Effect of natural genetic variation on enhancer selection and function.  
507 *Nature* **503**, 487-492, doi:10.1038/nature12615 (2013).
- 508 13 Capellini, T. D. *et al.* Ancient selection for derived alleles at a GDF5 enhancer  
509 influencing human growth and osteoarthritis risk. *Nat Genet* **49**, 1202-1210,  
510 doi:10.1038/ng.3911 (2017).

- 511 14 Jacobs, J. *et al.* The transcription factor Grainy head primes epithelial enhancers for  
512 spatiotemporal activation by displacing nucleosomes. *Nat Genet* **50**, 1011-1020,  
513 doi:10.1038/s41588-018-0140-x (2018).
- 514 15 Sagai, T., Hosoya, M., Mizushina, Y., Tamura, M. & Shiroishi, T. Elimination of a long-  
515 range cis-regulatory module causes complete loss of limb-specific Shh expression and  
516 truncation of the mouse limb. *Development* **132**, 797-803, doi:10.1242/dev.01613  
517 (2005).
- 518 16 Smemo, S. *et al.* Regulatory variation in a TBX5 enhancer leads to isolated congenital  
519 heart disease. *Hum Mol Genet* **21**, 3255-3263, doi:10.1093/hmg/dds165 (2012).
- 520 17 Arnold, C. D. *et al.* Quantitative genome-wide enhancer activity maps for five  
521 Drosophila species show functional enhancer conservation and turnover during cis-  
522 regulatory evolution. *Nat Genet* **46**, 685-692, doi:10.1038/ng.3009 (2014).
- 523 18 Vierstra, J. *et al.* Mouse regulatory DNA landscapes reveal global principles of cis-  
524 regulatory evolution. *Science* **346**, 1007-1012, doi:10.1126/science.1246426 (2014).
- 525 19 Franchini, L. F. & Pollard, K. S. Can a few non-coding mutations make a human brain?  
526 *Bioessays* **37**, 1054-1061, doi:10.1002/bies.201500049 (2015).
- 527 20 Kvon, E. Z. *et al.* Progressive Loss of Function in a Limb Enhancer during Snake  
528 Evolution. *Cell* **167**, 633-642 e611, doi:10.1016/j.cell.2016.09.028 (2016).
- 529 21 Chan, Y. F. *et al.* Adaptive evolution of pelvic reduction in sticklebacks by recurrent  
530 deletion of a Pitx1 enhancer. *Science* **327**, 302-305, doi:10.1126/science.1182213  
531 (2010).
- 532 22 McGregor, A. P. *et al.* Morphological evolution through multiple cis-regulatory  
533 mutations at a single gene. *Nature* **448**, 587-590, doi:10.1038/nature05988 (2007).
- 534 23 Prud'homme, B., Gompel, N. & Carroll, S. B. Emerging principles of regulatory  
535 evolution. *Proceedings of the National Academy of Sciences of the United States of*  
536 *America* **104 Suppl 1**, 8605-8612, doi:10.1073/pnas.0700488104 (2007).
- 537 24 Behura, S. K. *et al.* High-throughput cis-regulatory element discovery in the vector  
538 mosquito *Aedes aegypti*. *BMC genomics* **17**, 341, doi:10.1186/s12864-016-2468-x  
539 (2016).
- 540 25 Mysore, K., Li, P. & Duman-Scheel, M. Identification of *Aedes aegypti* cis-regulatory  
541 elements that promote gene expression in olfactory receptor neurons of distantly  
542 related dipteran insects. *Parasit Vectors* **11**, 406, doi:10.1186/s13071-018-2982-6  
543 (2018).
- 544 26 Ruiz, J. L. *et al.* Chromatin changes in *Anopheles gambiae* induced by *Plasmodium*  
545 *falciparum* infection. *Epigenetics Chromatin* **12**, 5, doi:10.1186/s13072-018-0250-9  
546 (2019).



- 547 27 Arnold, C. D. *et al.* Genome-wide quantitative enhancer activity maps identified by  
548 STARR-seq. *Science* **339**, 1074-1077, doi:10.1126/science.1232542 (2013).
- 549 28 Thorvaldsdottir, H., Robinson, J. T. & Mesirov, J. P. Integrative Genomics Viewer  
550 (IGV): high-performance genomics data visualization and exploration. *Briefings in*  
551 *bioinformatics* **14**, 178-192, doi:10.1093/bib/bbs017 (2013).
- 552 29 Bieli, D. *et al.* The *Drosophila melanogaster* Mutants *apb1* and *apXasta* Affect an  
553 Essential apterous Wing Enhancer. *G3* **5**, 1129-1143, doi:10.1534/g3.115.017707  
554 (2015).
- 555 30 Preger-Ben Noon, E. *et al.* Comprehensive Analysis of a cis-Regulatory Region Reveals  
556 Pleiotropy in Enhancer Function. *Cell reports* **22**, 3021-3031,  
557 doi:10.1016/j.celrep.2018.02.073 (2018).
- 558 31 Bieli, D. *et al.* Establishment of a Developmental Compartment Requires Interactions  
559 between Three Synergistic Cis-regulatory Modules. *PLoS Genet* **11**, e1005376,  
560 doi:10.1371/journal.pgen.1005376 (2015).
- 561 32 Anopheles gambiae Genomes, C. *et al.* Genetic diversity of the African malaria vector  
562 Anopheles gambiae. *Nature* **552**, 96-100, doi:10.1038/nature24995 (2017).
- 563 33 Schmidt, D. *et al.* Five-vertebrate ChIP-seq reveals the evolutionary dynamics of  
564 transcription factor binding. *Science* **328**, 1036-1040, doi:10.1126/science.1186176  
565 (2010).
- 566 34 Rada-Iglesias, A., Prescott, S. L. & Wysocka, J. Human genetic variation within neural  
567 crest enhancers: molecular and phenotypic implications. *Philos Trans R Soc Lond B*  
568 *Biol Sci* **368**, 20120360, doi:10.1098/rstb.2012.0360 (2013).
- 569 35 Riehle, M. M. *et al.* A cryptic subgroup of Anopheles gambiae is highly susceptible to  
570 human malaria parasites. *Science* **331**, 596-598, doi:10.1126/science.1196759 (2011).
- 571 36 Santolamazza, F. *et al.* Insertion polymorphisms of SINE200 retrotransposons within  
572 speciation islands of Anopheles gambiae molecular forms. *Malaria journal* **7**, 163,  
573 doi:10.1186/1475-2875-7-163 (2008).
- 574 37 Muller, H. M., Dimopoulos, G., Blass, C. & Kafatos, F. C. A hemocyte-like cell line  
575 established from the malaria vector Anopheles gambiae expresses six  
576 prophenoloxidase genes. *The Journal of biological chemistry* **274**, 11727-11735  
577 (1999).
- 578 38 Fanello, C., Santolamazza, F. & della Torre, A. Simultaneous identification of species  
579 and molecular forms of the Anopheles gambiae complex by PCR-RFLP. *Medical and*  
580 *Veterinary Entomology* **16** (2002).
- 581 39 Harris, C. *et al.* Polymorphisms in Anopheles gambiae immune genes associated with  
582 natural resistance to Plasmodium falciparum. *PLoS Pathog* **6**, e1001112,  
583 doi:10.1371/journal.ppat.1001112 (2010).

- 584 40 Redmond, S. N. *et al.* Association mapping by pooled sequencing identifies TOLL 11  
585 as a protective factor against Plasmodium falciparum in Anopheles gambiae. *BMC*  
586 *genomics* **16**, 779, doi:10.1186/s12864-015-2009-z (2015).
- 587 41 Kumar, S., Stecher, G., Li, M., Knyaz, C. & Tamura, K. MEGA X: Molecular Evolutionary  
588 Genetics Analysis across Computing Platforms. *Mol Biol Evol* **35**, 1547-1549,  
589 doi:10.1093/molbev/msy096 (2018).  
590

591 **Acknowledgments**

592 We thank the Center for Production and Infection of *Anopheles* platform (CEPIA) at the  
593 Institut Pasteur, and Corinne Genève and Emma Brito-Fravallo, GGIV Institut Pasteur, for  
594 rearing mosquitoes. We thank Alexander Stark, Research Institute of Molecular Pathology,  
595 Vienna for plasmids and helpful advice. This work received financial support to MMR from  
596 National Institutes of Health, NIAID #AI121587; to KDV from the European Commission,  
597 Horizon 2020 Infrastructures #731060 Infravec2; European Research Council, Support for  
598 Frontier Research, Advanced Grant #323173 AnoPath; and French Laboratoire d'Excellence  
599 "Integrative Biology of Emerging Infectious Diseases" #ANR-10-LABX-62-IBEID. The funders  
600 had no role in study design, data collection and analysis, decision to publish, or preparation  
601 of the manuscript.

602

603 **Author contributions statement**

604 Conceived and designed the experiments: MMR, DMG, KDV

605 Performed the experiments: LN, IH, DMG, SZ, WMG, NS, MMR

606 Analyzed the data: AP, EB, MMR

607 Wrote the manuscript: LN, MMR, KDV

608 All authors read and approved the final manuscript.

609

610 **Ethics statement**

611 No animals or human subjects were used. Mosquito colonies were maintained on  
612 anonymous commercial human blood using an artificial membrane feeding device.

613

614 **Data availability**

615 All short read sequence files are available from the EBI European Nucleotide Archive  
616 database (<http://www.ebi.ac.uk/ena/>) under ENA study accession number [REQUESTED]. All  
617 other sequences are available in this article as Supplementary Files S1 and S2.

618

619 **Competing interests statement**

620 The authors declare no competing interests.

621 **Table 1: Physical location of enhancer intervals and proximal annotated gene.** Enhancer  
622 interval coordinates are based on the locations of PCR primers given in Supplementary Table  
623 S2. Coordinates from the PEST AgamP4 genome assembly.

624

|       | <b>Proximal gene</b> | <b>Enhancer Interval</b> | <b>Proximal Gene Coordinates</b> |
|-------|----------------------|--------------------------|----------------------------------|
| AP    | (AGAP008980)         | 3R:22609939-22611138     | 3R:22543990-22609635             |
| OVO   | (AGAP000114)         | X:1888505-1890055        | X:1852650-1884326                |
| KLF   | (AGAP007038)         | 2L:41302647-41303886     | 2L:41287202-41308450             |
| LRIM1 | (AGAP006348)         | 2L:30333431-30334787     | 2L:30329656-30331296             |
| ACE1  | (AGAP001356)         | 2R:3485436-3486583       | 2R:3483099-3497400               |
| RDL   | (AGAP006028)         | 2L:25382828-25384253     | 2L:25363652-25434556             |

625

626 **FIGURE LEGENDS**

627

628 **Figure 1. Detection of *Anopheles coluzzii* candidate enhancers.** Sequence data near six  
629 *Anopheles coluzzii* genes were examined using the Integrative Genomics Viewer (IGV) <sup>28</sup> to  
630 screen for candidate enhancers, identified visually where coverage of the cDNA sequence  
631 track (solid lines) was greater than the baseline coverage of the plasmid sequence track  
632 (dotted lines). The cDNA sequence track is analogous to light output from luciferase reporter  
633 assays, but where the readout is enhancer-dependent RNA transcript output in *A. coluzzii*  
634 4a3A cells, measured as sequenced cDNA, rather than by luciferase light output. Line color  
635 (green, red, blue) represents three biological replicates. The enhancers are named by the  
636 most proximal genes: Krueppel-Like Factor 6/7 (KLF, AGAP007038), Leucine-Rich Immune  
637 protein (LRIM1, AGAP006348), Acetylcholinesterase (ACE1, AGAP001356), GABA-gated  
638 chloride channel subunit (Rdl, AGAP006028), LIM homeobox protein 2/9, ortholog of  
639 *Drosophila* apterous FBgn0267978 (AP, AGAP008980), and Ovo, AGAP000114 (Table1). A  
640 negative control interval within intron 1-2 of distal-less (DLX, AGAP007058) was chosen  
641 because it lacks visible divergence of cDNA and plasmid sequence tracks. Graphs display  
642 cDNA and plasmid tracks in 10 kb windows centered on the candidate enhancers. Only one  
643 candidate enhancer is seen in all windows except AP, where the central peak (arrow) was  
644 used. X-axis indicates genomic coordinates in the PEST reference genome, y-axis indicates  
645 normalized sequence depth corrected for overall plasmid depth observed in the IGV display.

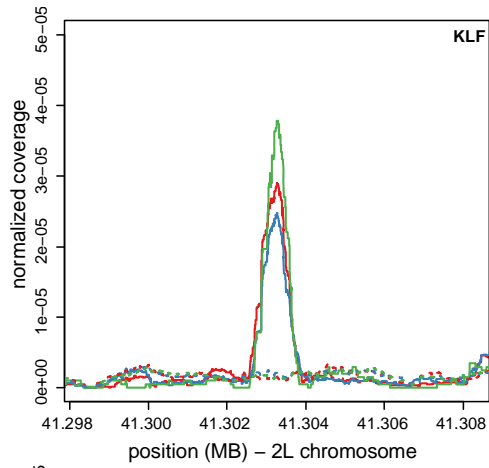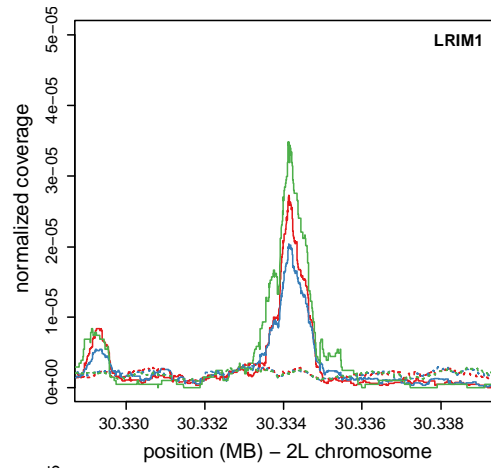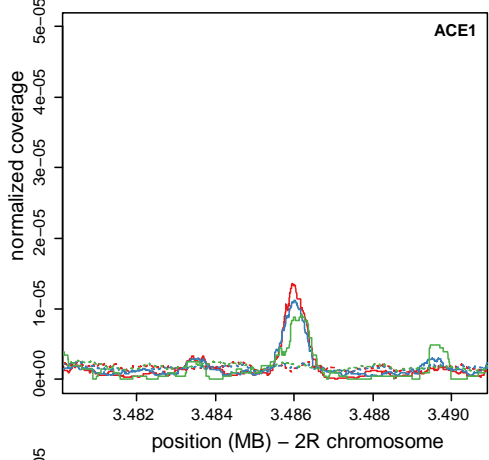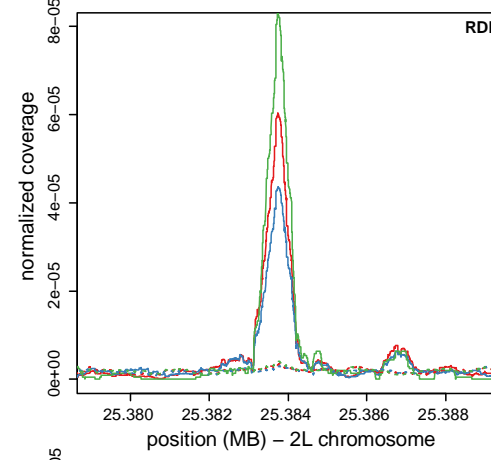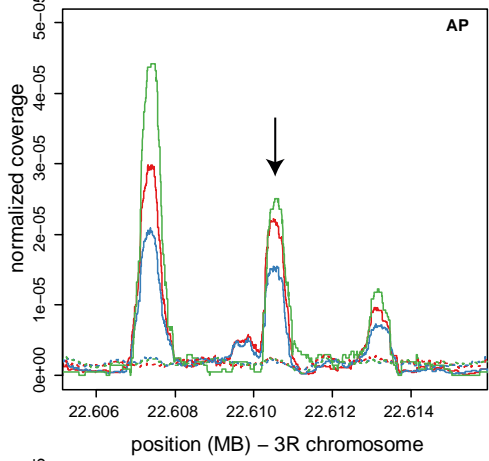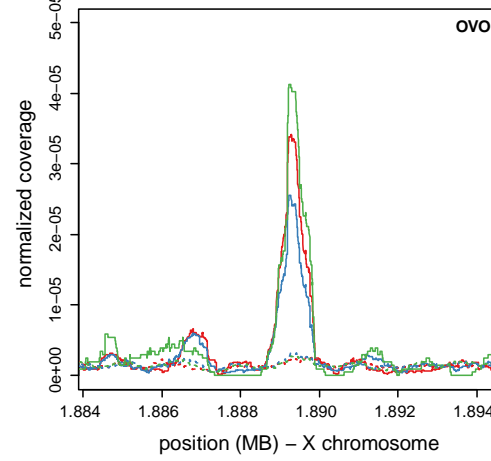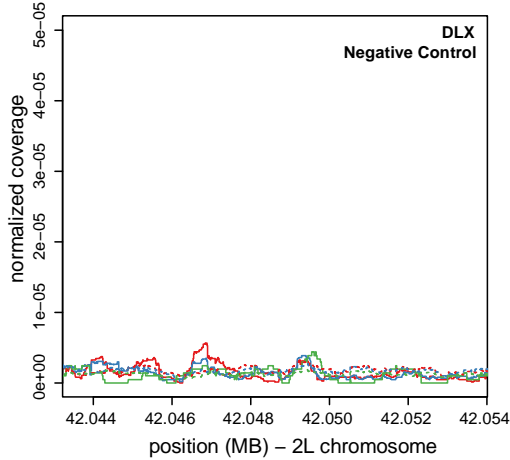

647 **Figure 2. Candidate *Anopheles coluzzii* enhancers augment expression of a luciferase**  
648 **reporter.** The six candidate enhancer intervals from Figure 1 were amplified from *Anopheles*  
649 *coluzzii* mosquitoes and cloned into the pGL-Gateway-DSCP plasmid carrying a basal core  
650 promoter and firefly luciferase reporter gene. The cloned candidates were tested for  
651 influence upon luciferase expression using a dual luciferase assay system to quantify  
652 luciferase activity above background, defined by the DLX negative control (horizontal dotted  
653 line). Each of the six tested candidates displayed normalized luciferase activity significantly  
654 above background ( $p < 0.005$ ), thus validating the candidates as functional *A. coluzzii*  
655 enhancers. Each point represents an individual replicate measure of luciferase activity for  
656 the tested candidate. Bars indicate the median and 95% confidence intervals. X-axis  
657 indicates the name of the candidate enhancer according to the nearest gene (Table 1), y-axis  
658 indicates the relative luciferase activity for each measurement, expressed as firefly luciferase  
659 corrected to the renilla luciferase internal control value, and normalized for the value of the  
660 DLX negative control (see Methods).



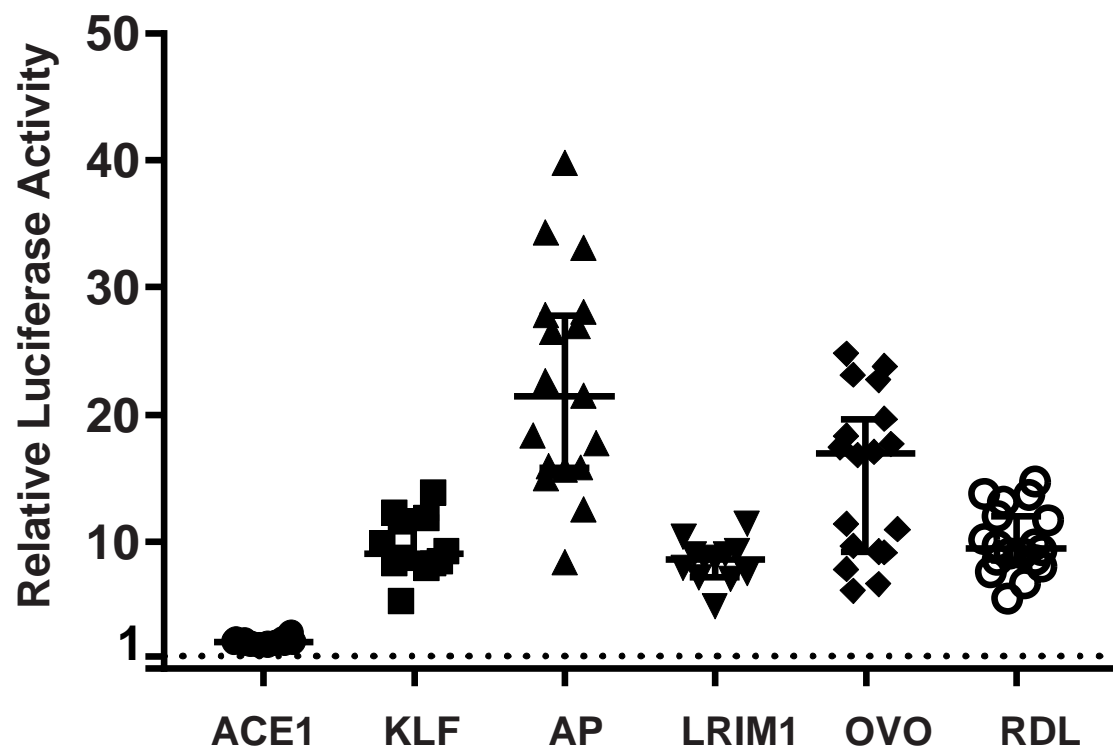

661

662 **Figure 3. Phylogenetic comparison of enhancer allele genetic variation.** Enhancer allelic  
663 variants were cloned and sequenced from *Anopheles coluzzii* colonies. Each sequenced clone  
664 represents a chromosomal haplotype. For each clone, individual sequences were aligned  
665 using MUSCLE and Mega was used to construct neighbor joining (N-J) trees for complete  
666 sequences for all haplotypes for each enhancer. Trees depict the degree of genetic similarity  
667 among alleles, and phylogenetic scale bars represent 0.5 nucleotide substitutions per site.  
668 The scale bar for the Rdl tree is long (pairwise distance 0.008 between alleles Fd03\_#2 and  
669 Fd09\_#1), indicating that the Rdl alleles segregate relatively little variation, while the Ovo  
670 tree scale bar is short (pairwise distance 0.0445 between alleles Fd03\_#8 and Fd05\_#4),  
671 indicating more than 5-fold greater genetic diversity among Ovo alleles as compared to Rdl.  
672 Alignments for complete sequences of alleles are presented in Supplementary File S1.

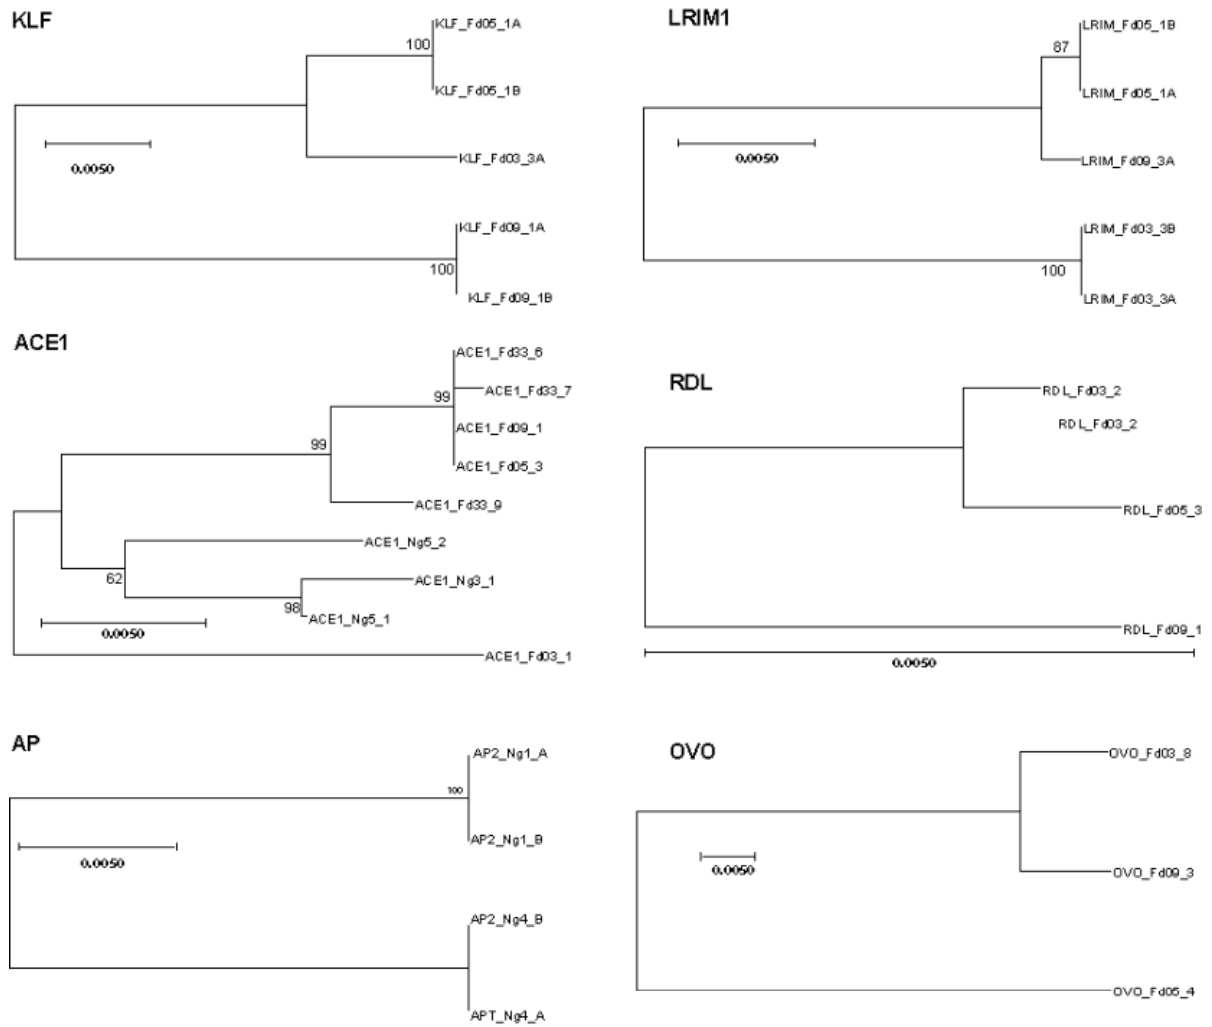

673  
674

675 **Figure 4. Genetic variation influences enhancer functional activity.** To test the functional  
676 effect of genetic variation within enhancer sequences, the enhancer alleles shown in Figure  
677 3 were cloned into luciferase reporter plasmid pGL-Gateway-DSCP, and luciferase activity  
678 was measured. Statistically significant differences in luciferase activity as determined using a  
679 non-parametric ANOVA are indicated by letters, samples labelled with different letters are  
680 significantly different from each other and samples with the same letter are not significantly  
681 different (thus samples labeled a,b are not statistically different from samples labelled either  
682 a or b). Bars indicate the median and 95% confidence intervals, n=12 for all tests. X-axis  
683 labels indicate colony origin (Ng, Ngousso, other colony names as given) and allele name, y-  
684 axis indicates the relative luciferase activity for each measurement determined as in Figure  
685 2.

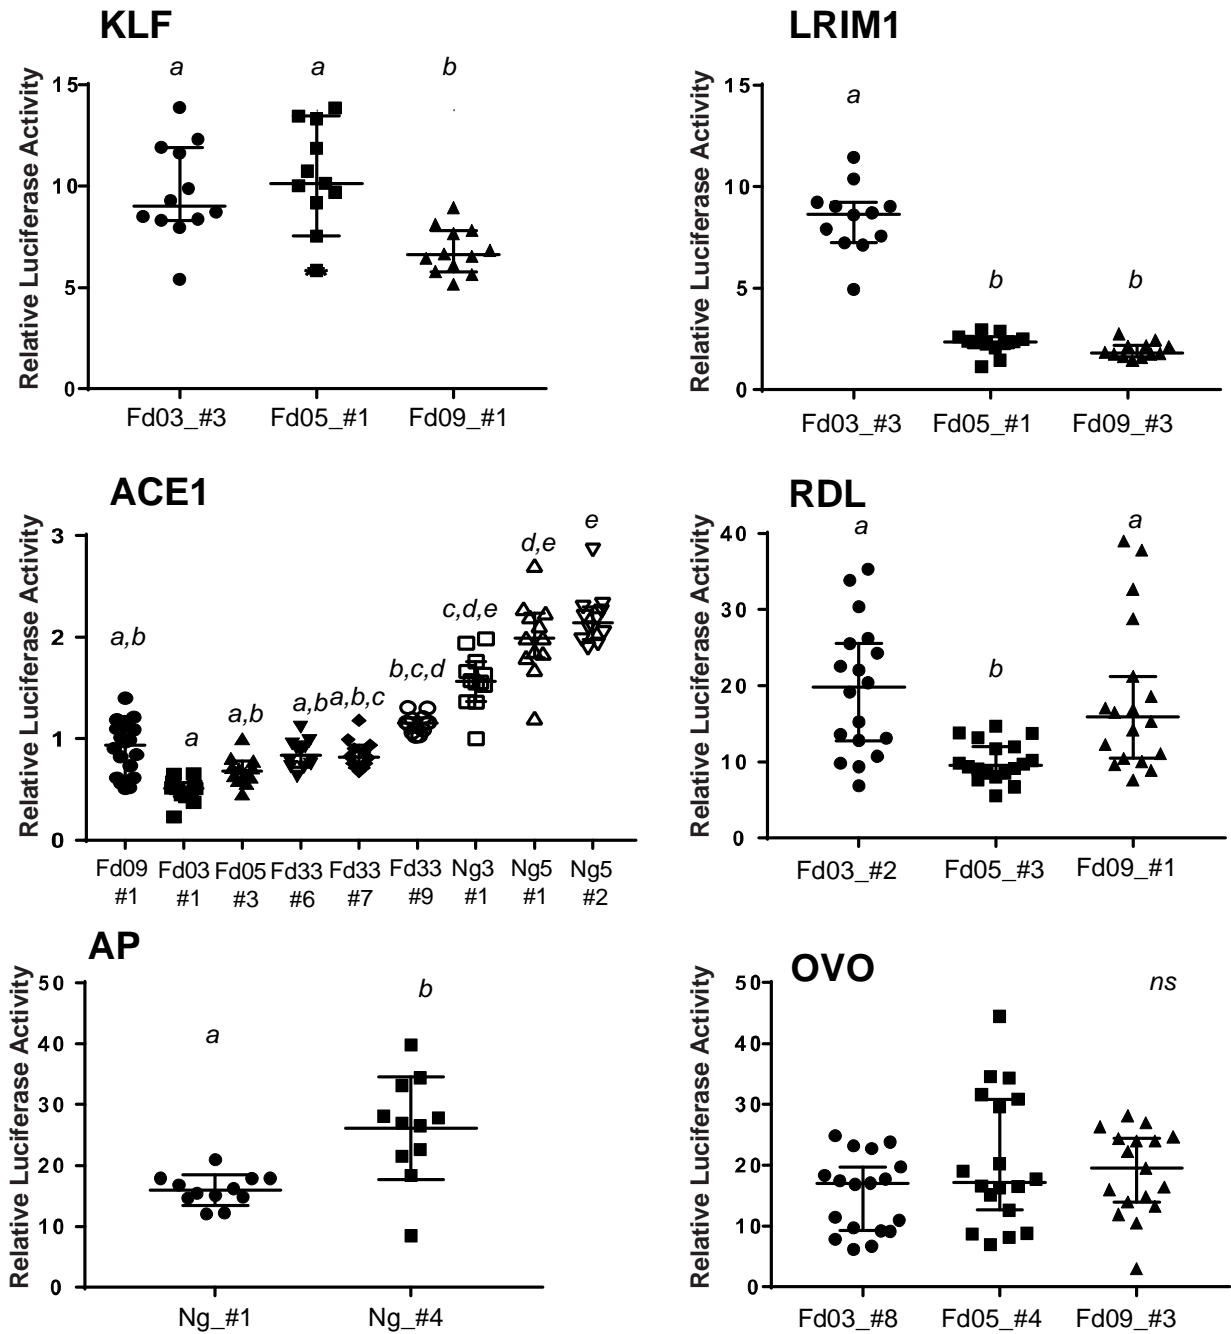

686  
687

688 **Figure 5. Enhancer activity is essentially independent of orientation.** The influence of  
689 physical orientation of the enhancer within the luciferase reporter plasmid pGL-Gateway-  
690 DSCP was tested by cloning three enhancers, KLF, AP and LRIM1, in both orientations in the  
691 plasmid, and luciferase activity was measured. KLF and AP enhancers displayed no  
692 detectable effect of orientation on luciferase activity, while LRIM1 displayed a slightly  
693 significant difference ( $p=0.042$ ) in luciferase activity for the allele Fd05\_#1. Statistical  
694 differences indicated by letters as in Figure 4, error bars as in Figure 4,  $n=12$  for all tests. X-  
695 axis indicates the name of the enhancer allele tested and the enhancer insert orientation  
696 (arbitrarily defined as A and B),  $n$  indicates the number of wells measured, y-axis indicates  
697 the relative luciferase activity for each measurement as in Figure 2.

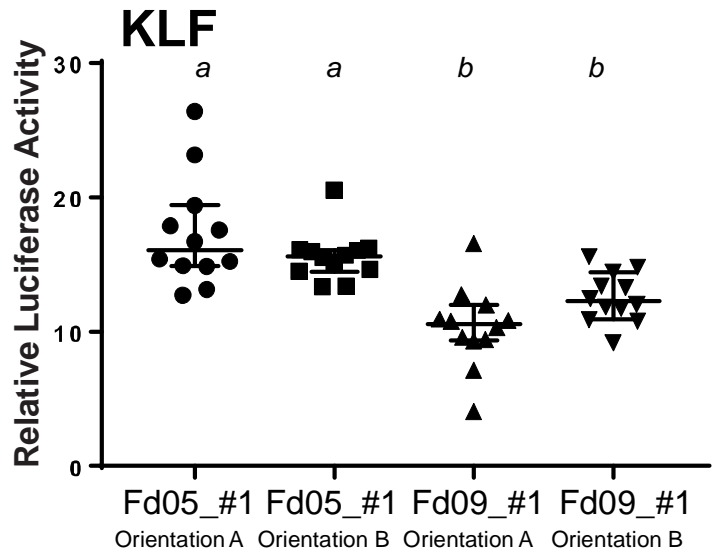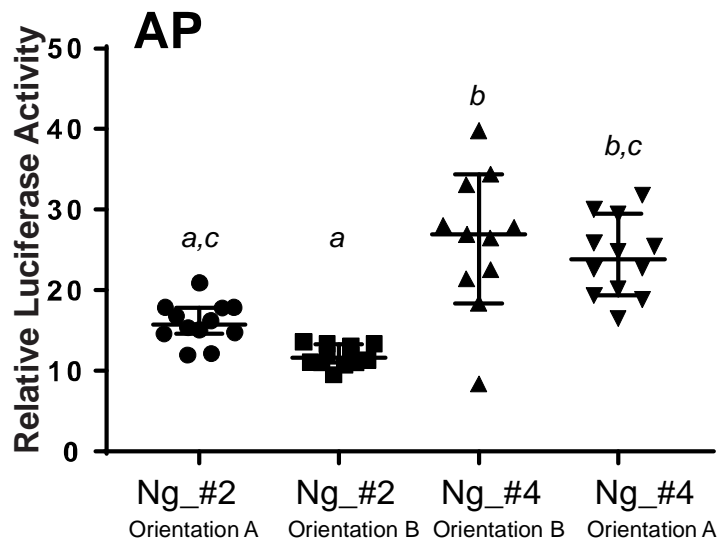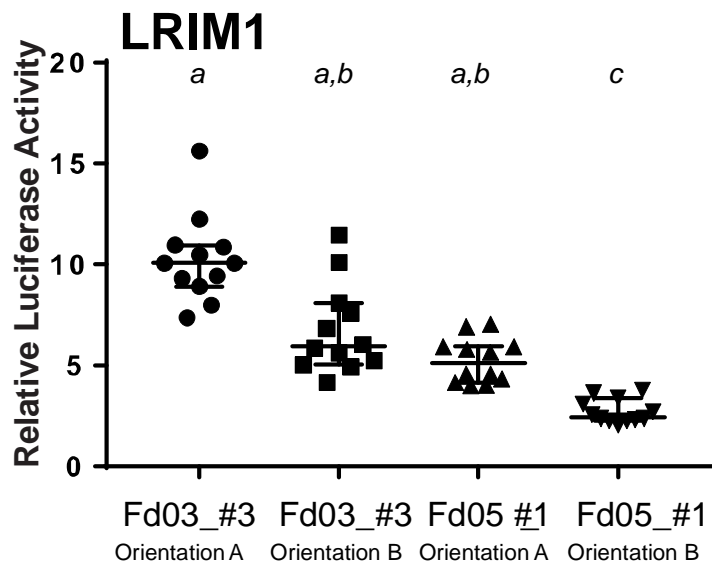

699 **Figure 6. Enhancer dissection reveals positive and negative regulatory elements.** Deletion  
700 mutagenesis was carried out for two alleles of the LRIM1 enhancer, the high-activity allele  
701 Fd03\_#3 and low-activity allele Fd05\_#1 (Figures 4 and 5). The integral enhancer alleles  
702 (100%) were each deleted for one-quarter of their length from both termini (50%  
703 derivative), and one-quarter length again (25% derivative). **A.** Deletion derivatives were  
704 tested for luciferase activity, along with the original integral alleles. Statistical differences  
705 indicated by letters as in Figure 4, error bars as in Figure 4, n=12 for all tests. X-axis indicates  
706 allele name and deletion derivatives, y-axis indicates the relative luciferase activity for each  
707 measurement as in Figure 2. Enhancer activity is not directly correlated with sequence  
708 length, and enhancer alleles are structured from distinct combinations of positive and  
709 negative regulators of transcription. **B.** Plot of the number of variant nucleotide positions  
710 between the Fd03\_#3 and Fd05\_#1 alleles along the length of the enhancer sequence.  
711 Variant sites are counted within a 50 bp non-overlapping window and plotted at the  
712 midpoint of the window. The light gray shading indicates the extent of the 50% length  
713 derivatives and the dark gray shading the 25% derivatives. X-axis indicates nucleotide  
714 position in derivatives, y-axis indicates number of variable sites between the Fd03\_#3 and  
715 Fd05\_#1 alleles in 50 bp windows. There were a total of 60 variable sites between Fd03\_#3  
716 and Fd05\_#1 alleles in the 100% integral enhancer, 37 variable sites in the 50% derivatives  
717 and 22 sites in the 25% derivatives. **C.** Neighbor-joining tree depicting sequence relatedness  
718 between the integral 100% enhancer and the 50% and 25% derivatives for LRIM1 Fd03\_#3  
719 and Fd05\_#1 alleles. The Fd09\_#3 allele is included as an outgroup. Scale bar description as  
720 in Figure 3.



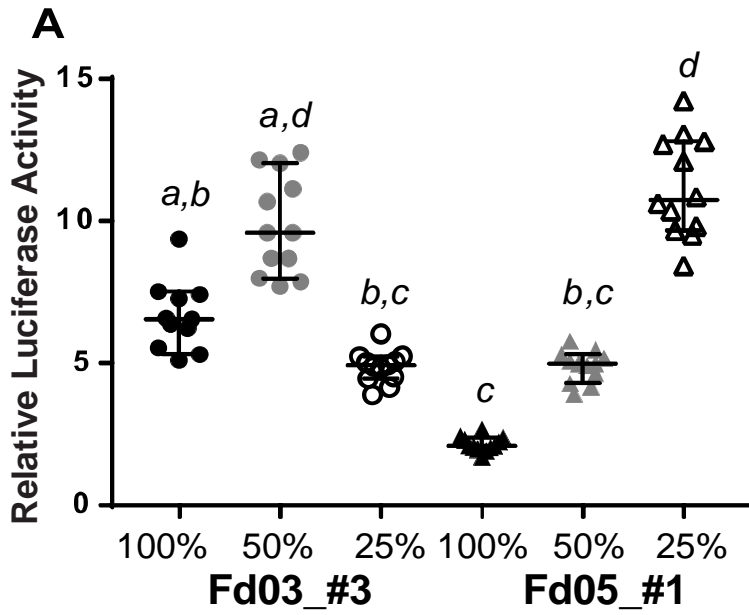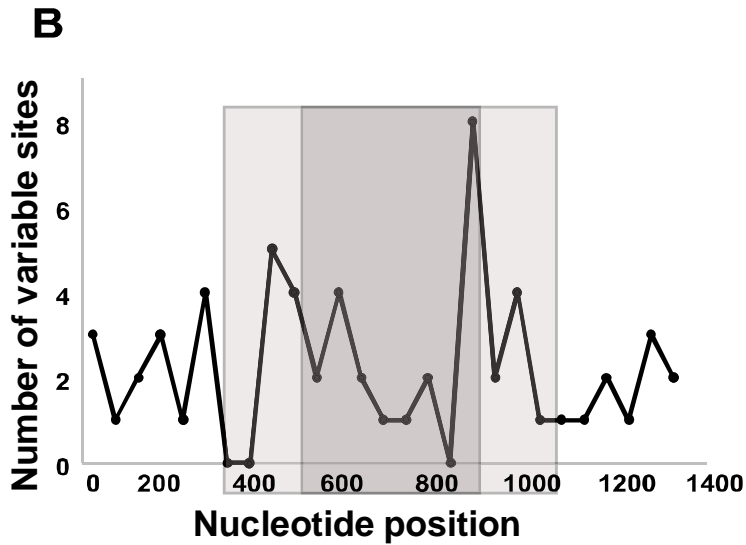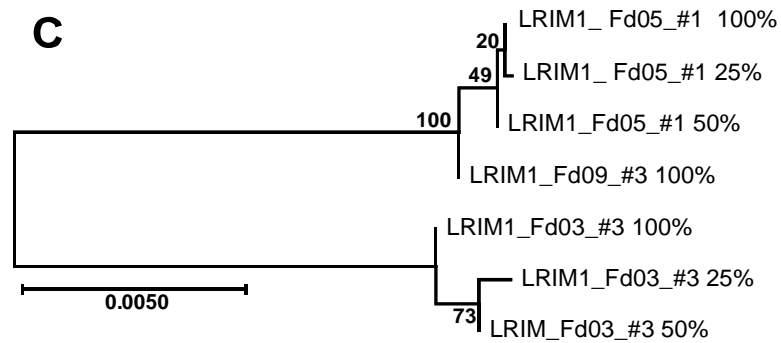

721

722 **Figure 7. Genetic variants in differentially active enhancer alleles segregate in wild**  
723 ***Anopheles coluzzii*.** Genetic variation observed in colonized and wild *A. coluzzii* was  
724 compared for the six studied enhancer intervals. Representative short sequence alignments  
725 are shown (full-length alignments with additional samples in Supplementary File S2).  
726 Asterisks above sequence alignments indicate variant positions shared between the cloned  
727 *A. coluzzii* colony haplotypes used in luciferase assays and the natural population. The top  
728 sequence row in each alignment is the PEST genome reference sequence, followed by  
729 sequences of alleles tested by luciferase assays (boxed by rectangles), followed by  
730 sequences of wild *A. coluzzii*. Ambiguous nucleic acid codes are used for heterozygous sites  
731 only in wild samples because the cloned sequences from *A. coluzzii* colonies are haplotypes,  
732 which are unambiguous.

## KLF

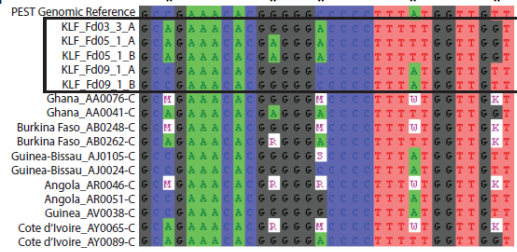

## LRIM1

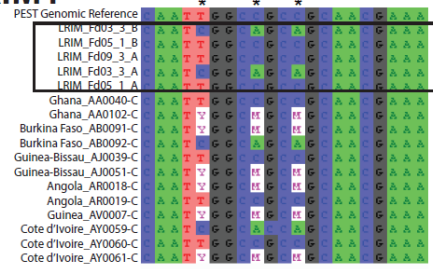

## ACE1

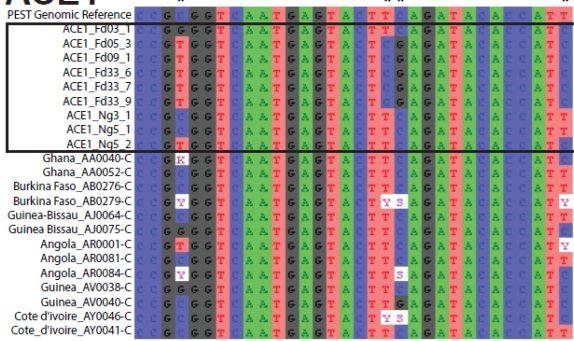

## RDL

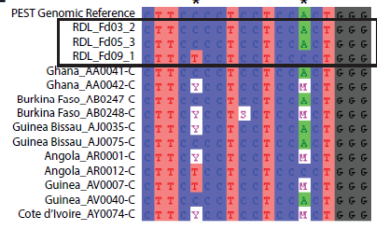

## AP

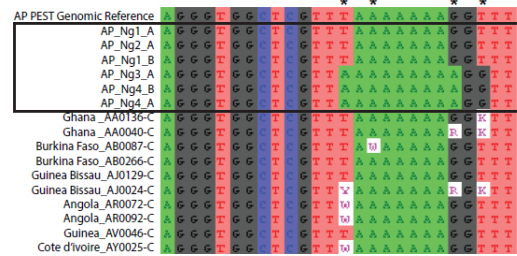

## OVO

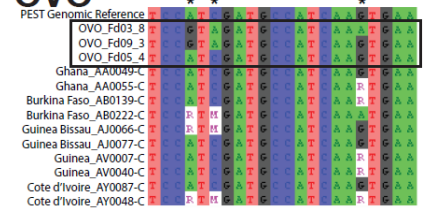

733
